# Supplementary material for: Recombinant Myxoma Virus-Derived Immune Modulator M-T7 Accelerates Cutaneous Wound Healing and Improves Tissue Remodeling
Source: PubMed Central journal article supplement (PMC7690590; doi:10.3390/pharmaceutics12111003), 2020-10-22
Supplement: pharmaceutics-12-01003-s001.pdf [file pharmaceutics-12-01003-s001.pdf]

## Supplementary Materials: Recombinant *Myxoma Virus*-Derived Immune Modulator M-T7 Accelerates Cutaneous Wound Healing and Improves Tissue Remodeling

Jordan R. Yaron, Liqiang Zhang, Qiuyun Guo, Enkidia A. Awo, Michelle Burgin, Lauren N. Schutz, Nathan Zhang, Jacquelyn Kilbourne, Juliane Daggett-Vondras, Kenneth M. Lowe and Alexandra R. Lucas

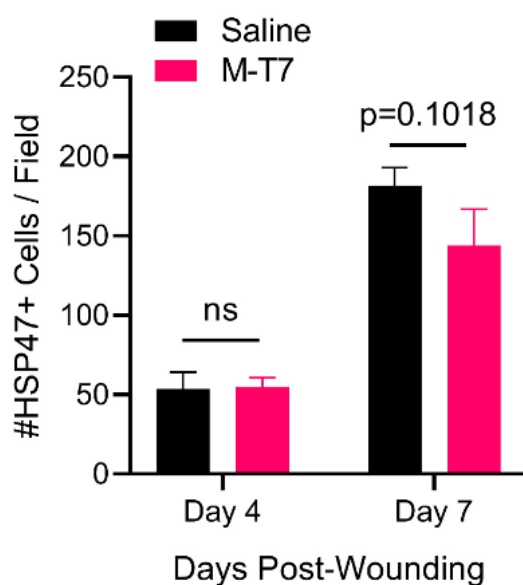

**Figure S1.** Quantification of IHC staining for HSP47+ cells per 20× field on tissues of mice on days 4 and 7 post-wounding and treated with saline or M-T7. Statistics analyzed by two-way ANOVA with Fischer's LSD post-hoc analysis. All bars are mean and standard error. N = 3-4 mice per treatment per time point.

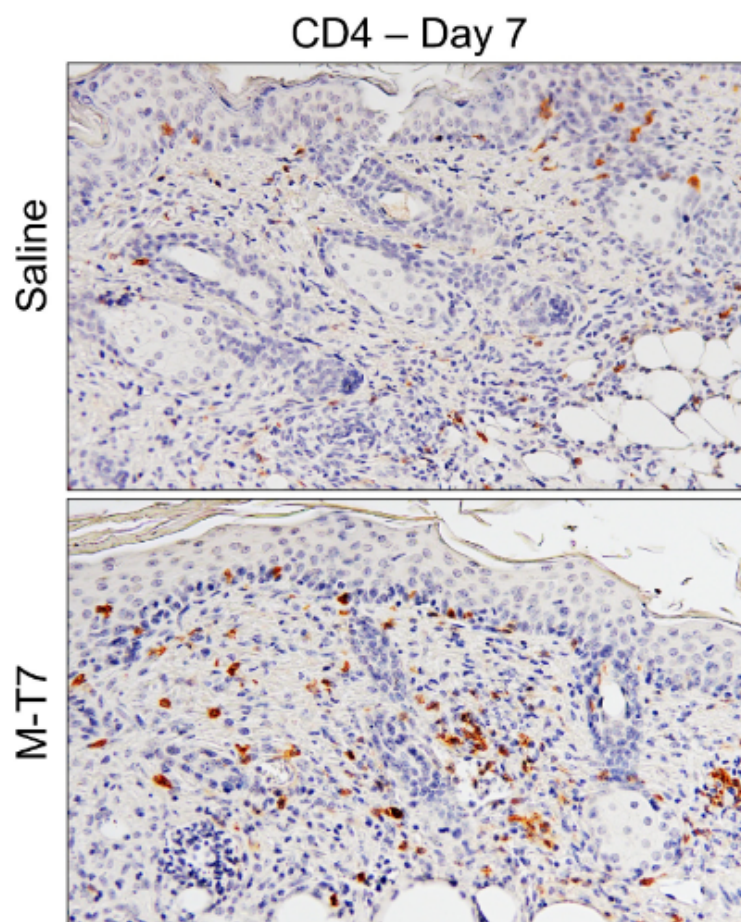

**Figure S2.** Full-frame 20× fields of CD4 IHC on Day 7 post-wounding for mice treated with saline and M-T7. Corresponds to Figure 4H in the main manuscript. Images are representative of 3–4 mice per treatment.

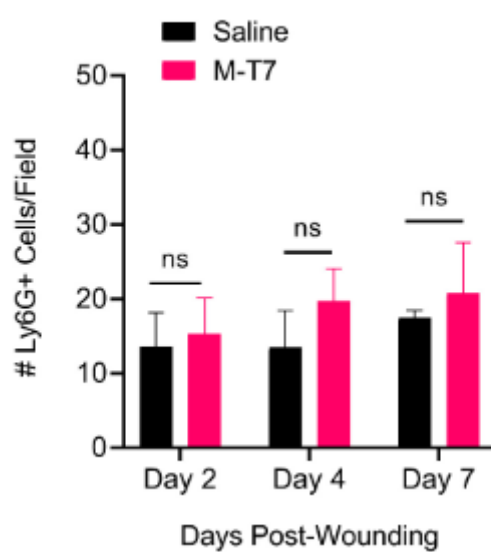

**Figure S3.** Quantification of IHC staining for Ly6G+ cells per 20× field on tissues of mice on days 4 and 7 post-wounding and treated with saline or M-T7. Statistics analyzed by two-way ANOVA with Fischer's LSD post-ho.
